# Supplementary material for: Associations between Gross and Fine Motor Skills, Physical Activity, Executive Function, and Academic Achievement: Longitudinal Findings from the UK Millennium Cohort Study
Source: MDPI journal article supplement (doi:10.3390/brainsci14020121), 2024-01-24
Supplement: s1 [file s1]

# Supplementary Materials

Figure S1. Measures of gross and fine motor skills.

| Gross Motor Coordination                                                               |
|----------------------------------------------------------------------------------------|
| Infant can sit up without being supported                                              |
| If infant is put down on the floor, he or she can move about from one place to another |
| Infant can stand up while holding on to something, such as furniture                   |
| Infant can walk a few steps on his or her own                                          |
| Fine Motor Coordination                                                                |
| Infant grabs objects using the whole hand                                              |
| Infant passes a toy back and forth from one hand to another                            |
| Infant can pick up an object using forefinger and thumb only                           |
| Infant puts his or her hands together                                                  |

Table S1. Regression table for decision making quality.

|                                       | Model 1       | Model 2       | Model 3       | Model 4       | Model 5       | Model 6       |
|---------------------------------------|---------------|---------------|---------------|---------------|---------------|---------------|
| <i>Socioeconomic status</i>           |               |               |               |               |               |               |
| Family income                         | 0.08(0.00)*** | 0.08(0.00)*** | 0.08(0.00)*** | 0.06(0.00)**  | 0.06(0.00)**  | 0.06(0.00)**  |
| Maternal education                    | 0.08(0.00)*** | 0.08(0.00)*** | 0.83(0.00)*** | 0.06(0.00)**  | 0.06(0.00)**  | 0.06(0.00)**  |
| <i>Early motor coordination</i>       |               |               |               |               |               |               |
| Gross motor coordination              |               | -0.02(0.00)   | -0.02(0.00)   | -0.02(0.00)   | -0.02(0.00)   | -0.02(0.00)   |
| Fine motor coordination               |               |               | 0.00(0.00)    | -0.01(0.00)   | -0.01(0.00)   | -0.01(0.00)   |
| <i>Verbal &amp; nonverbal ability</i> |               |               |               |               |               |               |
| Naming vocabulary                     |               |               |               | 0.04(0.00)    | 0.04(0.00)    | 0.04(0.00)    |
| Picture similarity                    |               |               |               | 0.03(0.00)    | 0.03(0.00)    | 0.03(0.00)    |
| Pattern construction                  |               |               |               | 0.11(0.00)*** | 0.11(0.00)*** | 0.11(0.00)*** |
| <i>Physical activity</i>              |               |               |               |               |               |               |
| MVPA                                  |               |               |               |               | -0.04(0.00)** | -0.04(0.00)** |
| Self-reported PA                      |               |               |               |               | 0.06(0.00)**  | 0.00(0.00)    |
| Constant                              | (0.01)**      | (0.03)***     | (0.05)***     | (0.05)***     | (0.05)**      | (0.05)***     |

Note. SE = Std. Error; \*\*p < .01; \*\*\*p < .001;  $\beta$  = Standardized coefficients. Model 1: Family income & maternal education. Model 2: Model 1 + Gross motor coordination. Model 3: Model 2 + Fine motor coordination. Model 4: Model 3 + BAS naming vocabulary & picture similarity & pattern construction. Model 5: Model 4 + MVPA. Model 6: Model 5 + Self-reported PA

**Table S2. Regression table for spatial working memory total errors.**

|                                              | Model 1        | Model 2        | Model 3        | Model 4        | Model 5        | Model 6        |
|----------------------------------------------|----------------|----------------|----------------|----------------|----------------|----------------|
| <b><i>Socioeconomic status</i></b>           |                |                |                |                |                |                |
| Family income                                | -0.14(0.00)*** | -0.15(0.00)*** | -0.15(0.00)*** | -0.11(0.00)*** | -0.11(0.00)*** | -0.11(0.00)*** |
| Maternal education                           | -0.11(0.19)*** | -0.11(0.19)*** | -0.11(0.19)*** | -0.08(0.18)*** | -0.08(0.18)*** | -0.08(0.18)*** |
| <b><i>Early motor coordination</i></b>       |                |                |                |                |                |                |
| Gross motor coordination                     |                | -0.02(0.27)    | -0.01(0.28)    | 0.00(0.27)     | 0.00(0.27)     | 0.00(0.27)     |
| Fine motor coordination                      |                |                | -0.02(0.39)    | -0.00(0.38)    | -0.00(0.38)    | -0.00(0.38)    |
| <b><i>Verbal &amp; nonverbal ability</i></b> |                |                |                |                |                |                |
| Naming vocabulary                            |                |                |                | 0.00(.10)      | 0.00(0.10)     | 0.00(0.10)     |
| Picture similarity                           |                |                |                | -0.07(.10)***  | -0.07(0.10)*** | -0.07(0.10)*** |
| Pattern construction                         |                |                |                | -0.23(.04)***  | -0.23(0.04)*** | -0.23(0.04)*** |
| <b><i>Physical activity</i></b>              |                |                |                |                |                |                |
| MVPA                                         |                |                |                |                | 0.01(0.01)     | 0.01(0.01)     |
| Self-reported PA                             |                |                |                |                |                | 0.00(0.34)     |
| Constant                                     | (0.84)**       | (2.73)***      | (4.91)***      | (4.93)***      | (5.00)**       | (5.15)***      |

Note. SE = Std. Error; \*\*p < .01; \*\*\*p < .001;  $\beta$  = Standardized coefficients.

Model 1: Family income & maternal education. Model 2: Model 1 + Gross motor coordination. Model 3: Model 2 + Fine motor coordination. Model 4: Model 3 + BAS naming vocabulary & picture similarity & pattern construction. Model 5: Model 4 + MVPA. Model 6: Model 5 + Self-reported PA
